# Supplementary material for: Occupational exposure to human Mycobacterium bovis infection: A systematic review
Source: PubMed Central journal article supplement (PMC5786333; doi:10.1371/journal.pntd.0006208), 2018-01-16
Supplement: pntd.0006208.s003.pdf [file pntd.0006208.s003.pdf]

## S1 Appendix. Extensive overview of search terms

### PubMed:

(Bovine tuberculosis) OR (zoonotic tuberculosis) OR (mycobacterium bovis)

Filter: human

Filter: From January 2006 to March 2017

("tuberculosis, bovine"[MeSH Terms] OR ("tuberculosis"[All Fields] AND "bovine"[All Fields]) OR "bovine tuberculosis"[All Fields] OR ("bovine"[All Fields] AND "tuberculosis"[All Fields])) OR (zoonotic [All Fields] AND ("tuberculosis"[MeSH Terms] OR "tuberculosis"[All Fields])) OR ("mycobacterium bovis"[MeSH Terms] OR ("mycobacterium"[All Fields] AND "bovis"[All Fields]) OR "mycobacterium bovis"[All Fields]) AND (("2006/01/01"[PDAT]: "2017/03/31"[PDAT]) AND "humans"[MeSH Terms])

### Science direct:

(Bovine tuberculosis) OR (zoonotic tuberculosis) OR (mycobacterium bovis)

Filter: From 2006 to 2017

Filter (topics): patient / mycobacterium / tuberculosis / human / disease / infection

Filter: Journal

pub-date > 2005 and (zoonotic tuberculosis)OR(bovine tuberculosis)OR(mycobacterium bovis) AND LIMIT-TO(topics, "mycobacterium,patient,tuberculosis,human,disease,infection") .

### Cochrane library:

(Bovine tuberculosis) OR (zoonotic tuberculosis) OR (mycobacterium bovis)

Filter: From 2006 to 2017

(Bovine tuberculosis) or (zoonotic tuberculosis) or (mycobacterium bovis):ti,ab,kw Publication Year from 2006 to 2017 (Word variations have been searched)
